# Supplementary material
Source: publisher site journal article supplement (https://www.dovepress.com/get_supplementary_file.php?f=251978.docx)
Supplement: Supplementary file 1 [file get_supplementary_file.php]

**Supplementary Table 1:** Comparison among the different categories using the general linear model analysis of covariance.

| **Biochemical parameters** | **Category** | **Mean Difference** | **95% Confidence Interval** | | **P-value #** |
| --- | --- | --- | --- | --- | --- |
| Lower Bound | Upper Bound |
| Body Mass Index (Kg/m2) | NL vs. Predm | -1.12 | -3.89 | 1.65 | 0.425 |
|  | NL vs. T2D | -1.30 | -3.71 | 1.11 | 0.288 |
|  | Predm vs. T2D | -0.18 | -2.52 | 2.16 | 0.879 |
| Waist-to-Hip ratio | NL vs. Predm | -0.03 | -0.15 | 0.09 | 0.635 |
|  | NL vs. T2D | -0.11 | -0.21 | 0.00 | 0.055 |
|  | Predm vs. T2D | -0.08 | -0.19 | 0.03 | 0.172 |
| Body fat (%) | NL vs. Predm | -0.57 | -4.53 | 3.40 | 0.776 |
|  | NL vs. T2D | -1.09 | -4.47 | 2.30 | 0.525 |
|  | Predm vs. T2D | -0.52 | -4.02 | 2.99 | 0.769 |
| Soft lean mass (%) | NL vs. Predm | 0.52 | -3.42 | 4.45 | 0.794 |
|  | NL vs. T2D | 1.00 | -2.36 | 4.37 | 0.553 |
|  | Predm vs. T2D | 0.49 | -3.00 | 3.97 | 0.781 |
| Total Body water (%) | NL vs. Predm | 0.37 | -2.50 | 3.23 | 0.800 |
|  | NL vs. T2D | 0.72 | -1.72 | 3.17 | 0.558 |
|  | Predm vs. T2D | 0.36 | -2.17 | 2.89 | 0.780 |
| SLM%-to-BF% ratio | NL vs. Predm | 0.04 | -0.32 | 0.41 | 0.811 |
|  | NL vs. T2D | 0.12 | -0.19 | 0.43 | 0.444 |
|  | Predm vs. T2D | 0.08 | -0.24 | 0.40 | 0.638 |
| HbA1c (%) | NL vs. Predm | -0.65 | -1.39 | 0.08 | 0.082 |
|  | NL vs. T2D | -2.98 | -3.62 | -2.34 | 0.0001* |
|  | Predm vs. T2D | -2.33 | -2.94 | -1.71 | 0.0001* |
| Fasting plasma glucose (mmol/L) | NL vs. Predm | -0.27 | -1.47 | 0.93 | 0.656 |
|  | NL vs. T2D | -3.75 | -4.80 | -2.70 | 0.0001* |
|  | Predm vs. T2D | -3.48 | -4.49 | -2.47 | 0.0001* |
| Insulin (mU/L) | NL vs. Predm | -12.45 | -27.08 | 2.18 | 0.094 |
|  | NL vs. T2D | -13.63 | -26.04 | -1.22 | 0.032* |
|  | Predm vs. T2D | -1.18 | -13.31 | 10.95 | 0.846 |
| HOMA-IR | NL vs. Predm | -3.09 | -7.96 | 1.78 | 0.210 |
|  | NL vs. T2D | -6.55 | -10.67 | -2.40 | 0.002* |
|  | Predm vs. T2D | -3.45 | -7.48 | 0.59 | 0.093 |
| Total Chol (mmol/L) | NL vs. Predm | -0.68 | -1.36 | 0.00 | 0.049* |
|  | NL vs. T2D | -0.11 | -0.70 | 0.48 | 0.712 |
|  | Predm vs. T2D | 0.57 | 0.00 | 1.14 | 0.050* |
| HDL Chol (mmol/L) | NL vs. Predm | 0.00 | -0.20 | 0.19 | 0.990 |
|  | NL vs. T2D | 0.13 | -0.04 | 0.30 | 0.129 |
|  | Predm vs. T2D | 0.13 | -0.03 | 0.30 | 0.115 |
| Estimated LDL Chol (mmol/L) | NL vs. Predm | -0.62 | -1.23 | -0.02 | 0.043* |
|  | NL vs. T2D | 0.24 | -0.29 | 0.77 | 0.376 |
|  | Predm vs. T2D | 0.86 | 0.35 | 1.37 | 0.001* |
| Triglycerides (mmol/L) | NL vs. Predm | -0.09 | -0.73 | 0.54 | 0.768 |
|  | NL vs. T2D | -0.79 | -1.35 | -0.24 | 0.005* |
|  | Predm vs. T2D | -0.70 | -1.24 | -0.16 | 0.011 |
| Total Chol-to-HDL Chol ratio | NL vs. Predm | -0.49 | -1.31 | 0.33 | 0.239 |
|  | NL vs. T2D | -0.52 | -1.24 | 0.20 | 0.153 |
|  | Predm vs. T2D | -0.03 | -0.73 | 0.67 | 0.928 |
| CRP (µg/mL) | NL vs. Predm | 0.22 | -2.52 | 2.95 | 0.873 |
|  | NL vs. T2D | -1.42 | -3.90 | 1.07 | 0.258 |
|  | Predm vs. T2D | -1.64 | -3.90 | 0.62 | 0.153 |
| White blood cell count (109/L) | NL vs. Predm | -1.08 | -2.28 | 0.12 | 0.077 |
|  | NL vs. T2D | -1.65 | -2.67 | -0.62 | 0.002* |
|  | Predm vs. T2D | -0.56 | -1.59 | 0.46 | 0.278 |

Note: #Adjustment for multiple comparisons (Least significant difference); *Mean difference is significant at the 0 .05 level. Abbreviations: SLM, soft lean mass; BF, body fat; HbA1c, glycated hemoglobin; HOMA-IR, Homeostatic Model Assessment of Insulin Resistance; Chol, cholesterol; HDL, high-density lipoprotein; LDL, low-density lipoprotein; CRP, c-reactive protein; NL, normal glycemia; Predm, prediabetes; T2D, type 2 diabetes.

**Summary of Analysis**

Supplementary Table 1 represents the results of the linear model of covariance analysis. HbA1c and fasting plasma glucose levels were significantly high in type 2 diabetes group compared to the prediabetes and normal level glycemia group (*P*<0.001). Type 2 diabetes group also had a significantly increase level of insulin, HOMA-IR, triglyceride, and WBCs than the normal glycaemia group (*P*<0.05). Total cholesterol and estimated cholesterol level were higher in the prediabetes group, and differences with diabetes and normal glycemia group were significant (*P*< 0.05).

| **Gene** | **Assay ID** |
| --- | --- |
| *CCL2* | Hs00234140_m1 |
| *CCL5* | Hs00982282_m1 |
| *CCL7* | Hs00171147_m1 |
| *CCL8* | Hs04187715_m1 |
| *CCL11* | Hs00237013_m1 |
| *CCL15* | Hs00361122_m1 |
| *CCL19* | Hs00171149_m1 |
| *CCL20* | Hs01011368_m1 |
| *CXCL9* | Hs00171065_m1 |
| *CXCL10* | Hs01124251_g1 |
| *IL-1β* | Hs01555410_m1 |
| *TNF-α* | Hs01113624_g1 |
| *IL-5* | Hs01548712_g1 |
| *IL-6* | Hs00985639_m1 |
| *IL-8* | Hs00174103_m1 |
| *IL-10* | Hs00961622_m1 |
| *IL-12A* | Hs01073447_m1 |
| *IL-13* | Hs00174379_m1 |
| *IL-18* | Hs01038788_m1 |
| *IL-23A* | Hs00900828_g1 |
| *IL-33* | Hs00369211_m1 |
| *ST2* | Hs00545033_m1 |
| *TGF-β* | Hs00820148_g1 |
| *FGL2* | Hs00173847_m1 |
| *PRT2D16* | Hs00922674_m1 |
| *UCP1* | Hs00222453_m1 |
| *COX7A1* | Hs03045102_g1 |
| *MyD88* | Hs01573837_g1 |
| *TRAF6* | Hs00371512_g1 |
| *NF-κB* | Hs00765730_m1 |
| *IRF3* | Hs01547283_m1 |
| *IRF4* | Hs01056533_m1 |
| *IRF5* | Hs00158114_m1 |
| *NFAT5* | Hs00232437_m1 |
| *GAPDH* | Hs03929097_g1 |

**Supplementary Table 2:** Assay IDs of the analyzed genes.
